# Supplementary material for: Identification of Host Factors Differentially Induced by Clinically Diverse Strains of Tick-Borne Encephalitis Virus
Source: PubMed Central journal article supplement (PMC9517736; doi:10.1128/jvi.00818-22), 2022-09-13
Supplement: jvi.00818-22-s0001.pdf [file jvi.00818-22-s0001.pdf]

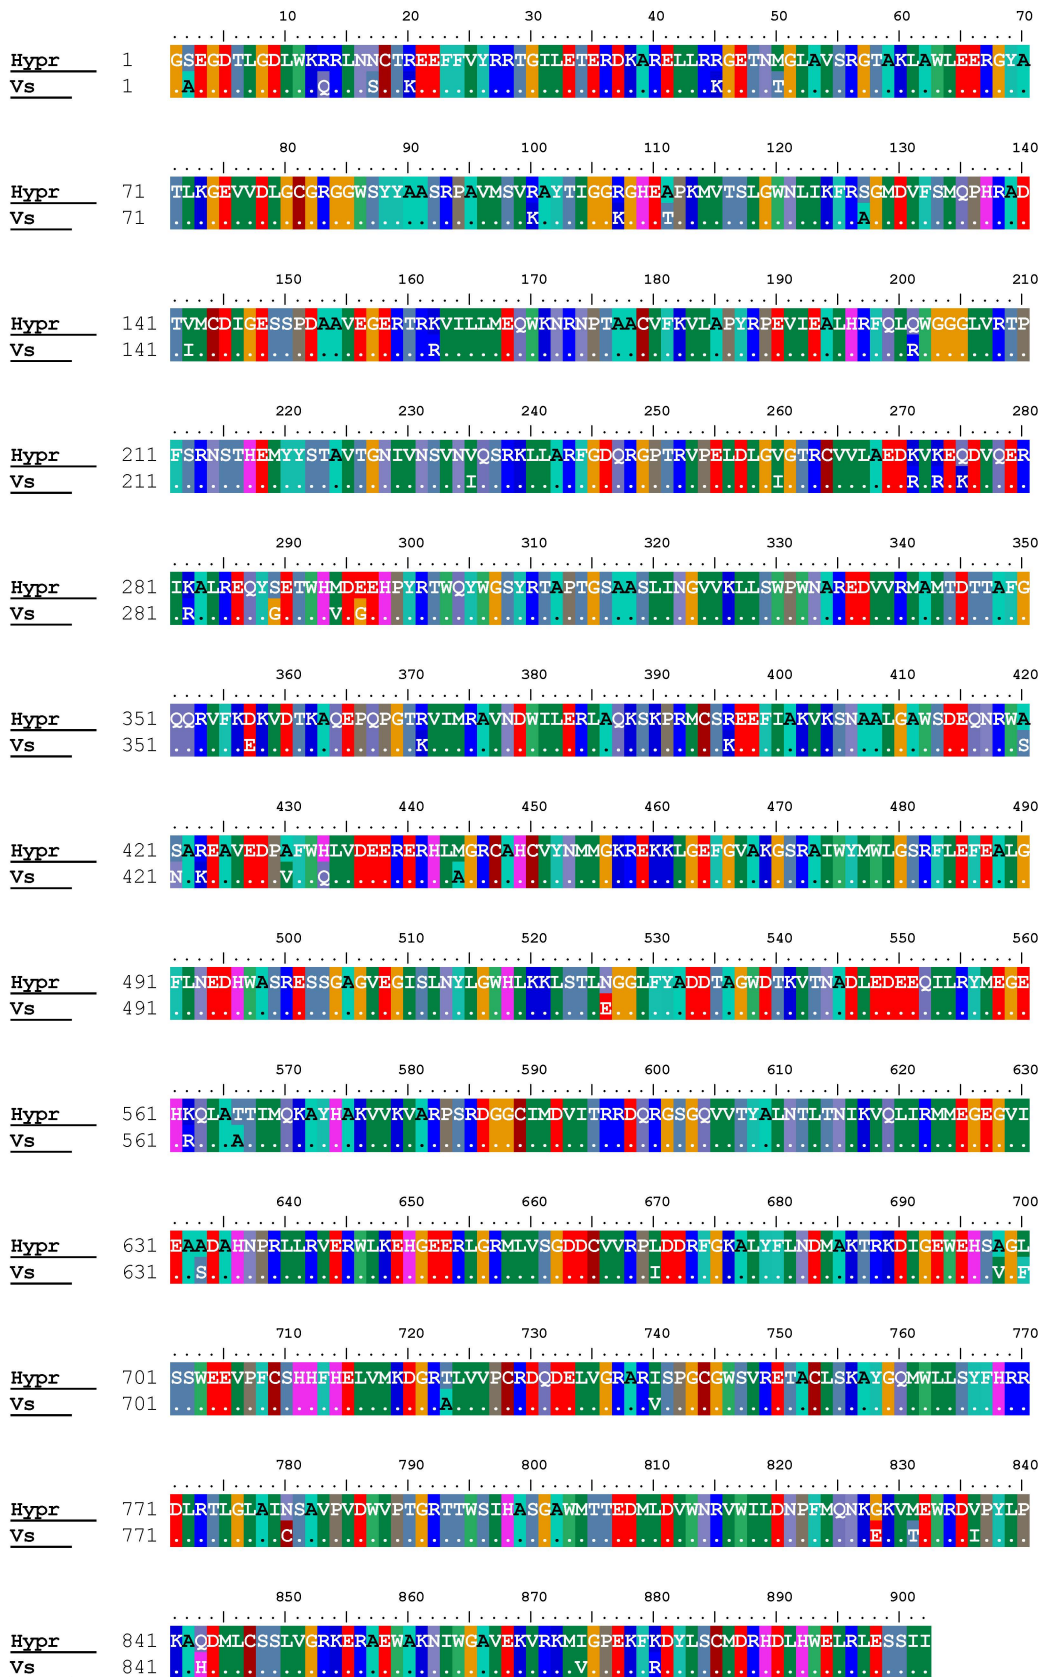

**Fig S1.** Sequence alignment of full-length NS5 in Hypr and Vasilchenko (Vs) strains. GenBank accession numbers: Hypr (U39292) and Vasilchenko (AF069066). Conserved residues are indicated by the dotted lines.

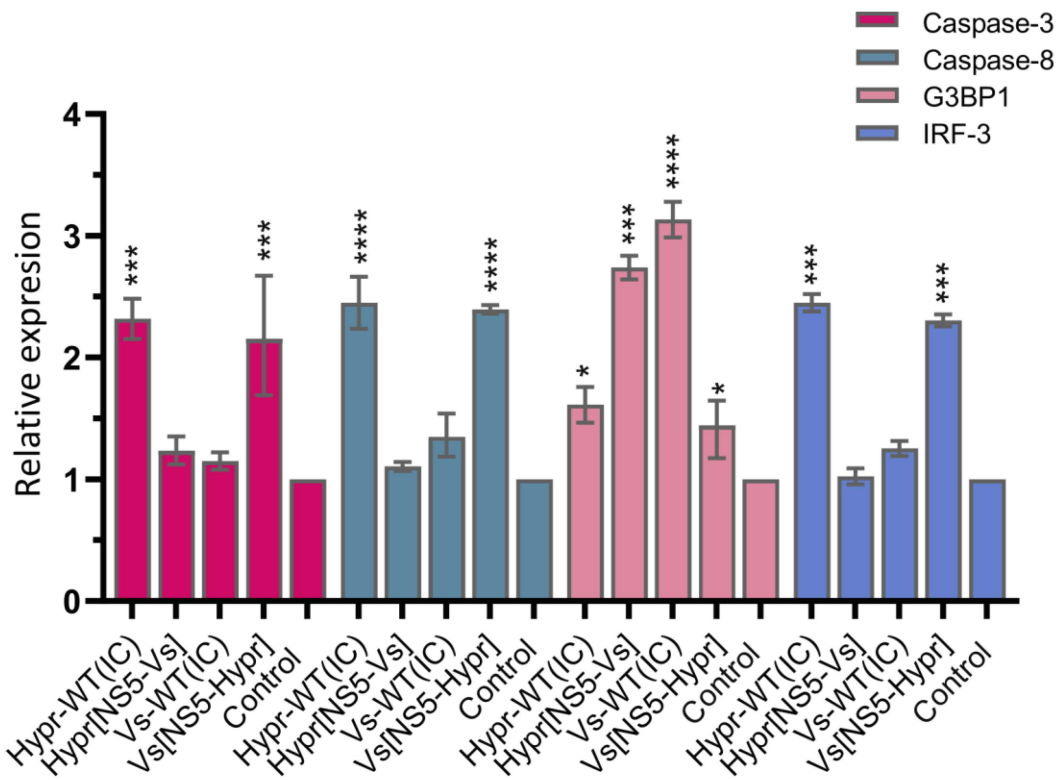

**Fig S2.** Regulation of mammalian host gene expression in Hypr/Vs or NS5 chimeras. PS cells were transfected with Hypr/Vs or the indicated NS5 chimeras (1  $\mu$ g) for 24 h and mRNA levels of Caspase-3, -8, G3BP1 and IRF-3 were determined by SYBR green based quantitative PCR. GAPDH was included as an internal control. Data represent the mean SE from two independent experiments. Untransfected cells were compared as a control. \*\*\*,  $P < 0.0004$  and \*\*\*\*,  $P < 0.0001$  \*\*\*\* from uninfected controls determined using a two-tailed Student's *t*-test with Welch's correction.
